# Supplementary material for: Previously hidden landslide processes revealed using distributed acoustic sensing with nanostrain-rate sensitivity
Source: PubMed Central journal article supplement (PMC11266418; doi:10.1038/s41467-024-50604-6), 2024-07-24
Supplement: 41467_2024_50604_MOESM1_ESM.pdf [file 41467_2024_50604_MOESM1_ESM.pdf]

Supplementary Materials for

**Previously hidden landslide processes revealed using distributed  
acoustic sensing with nanostrain-rate sensitivity**

Susanne Ouellet *et al.*

\*Corresponding author. Email: [susanne.ouellet2@ucalgary.ca](mailto:susanne.ouellet2@ucalgary.ca)

**This PDF file includes:**

Supplementary Figs. S1 to S8

Bedding trough on sand.

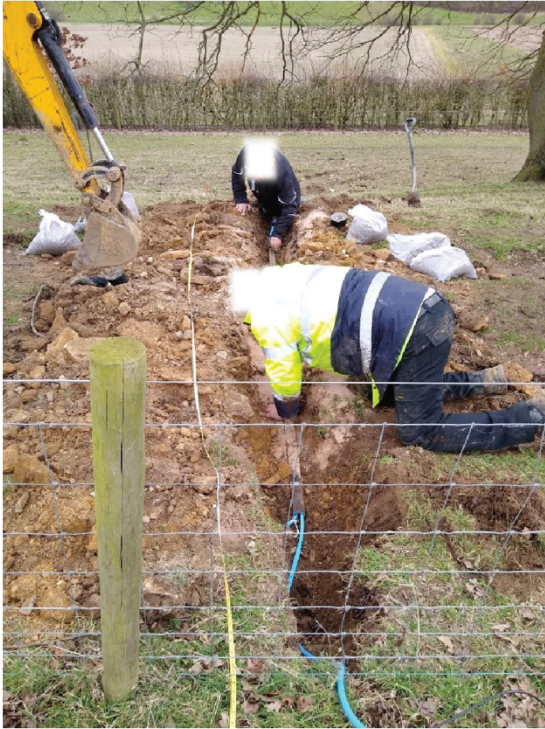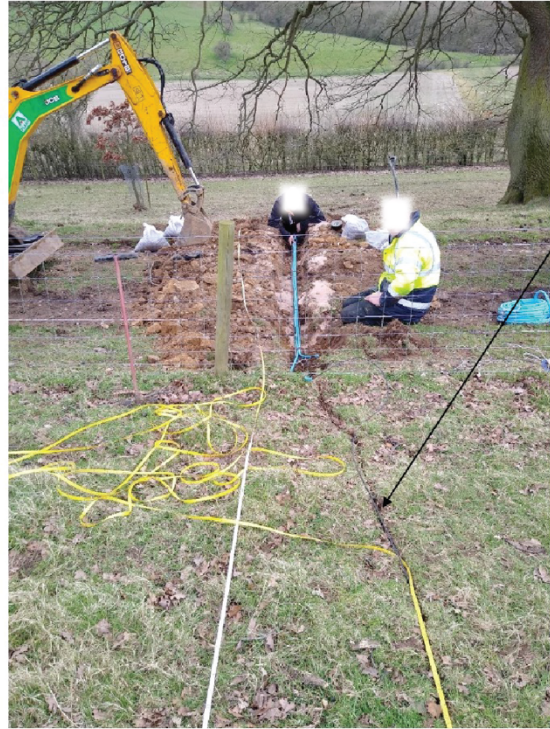

Bare FO cable in slotted trench in Hollin Hill field.

**Fig. S1** Photos of the fiber optic installation, showing the transition from protective housing to the bare cable at Hollin Hill. Faces have been blurred to conceal identities of individuals in photograph.

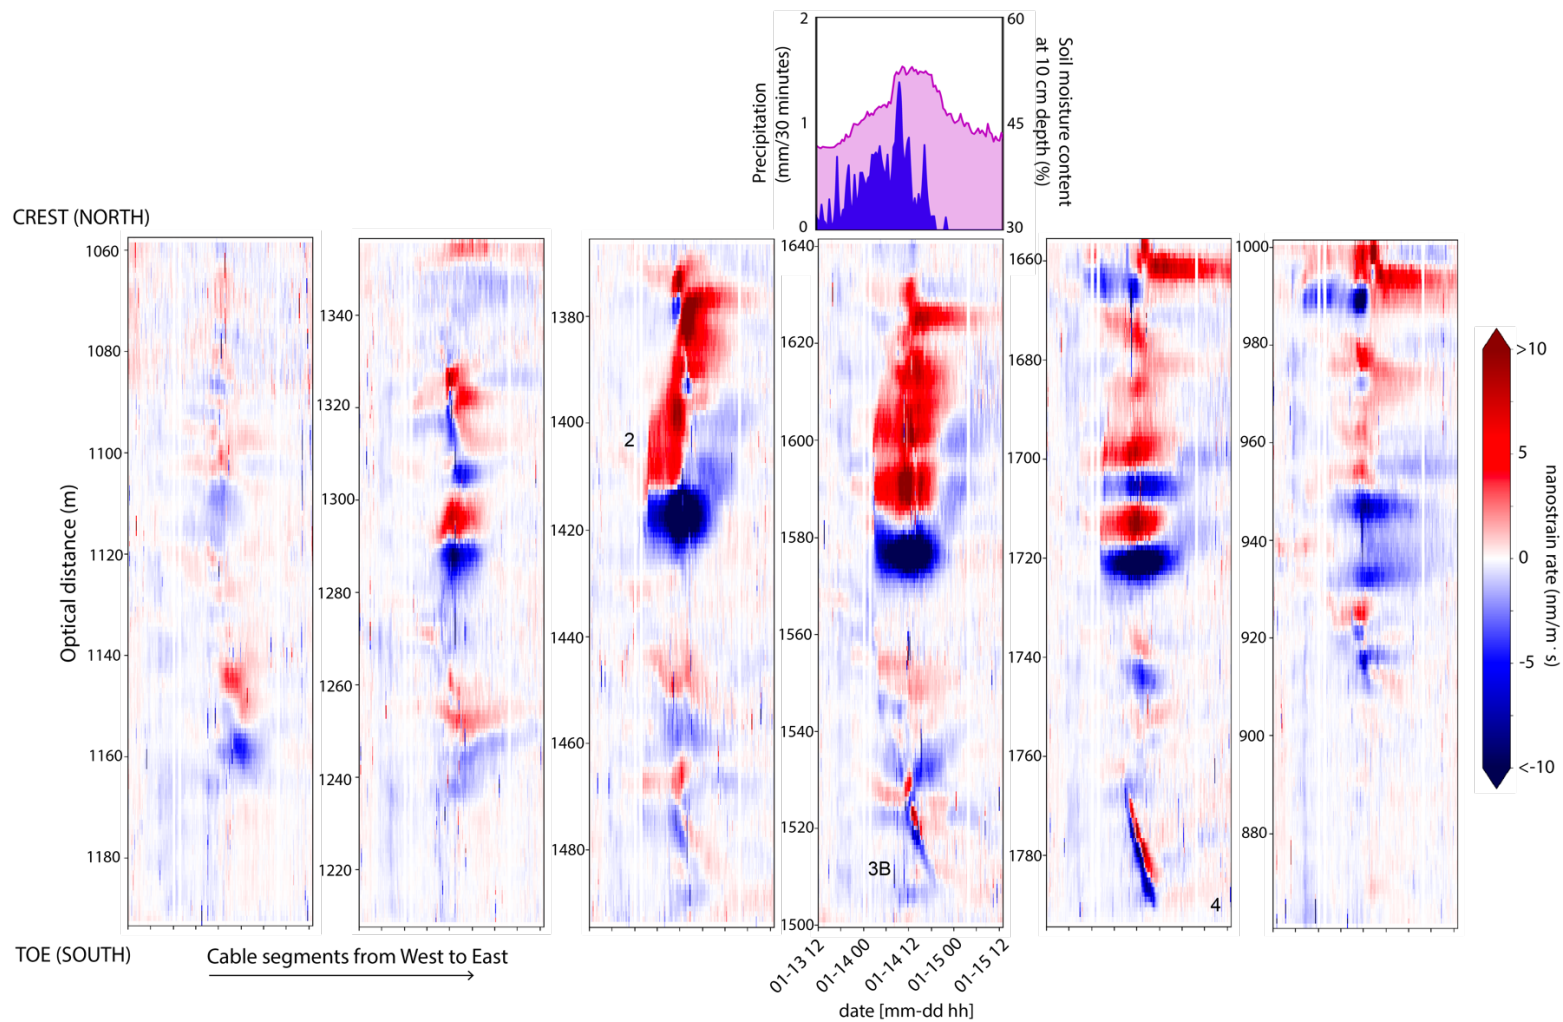

**Fig. S2** DAS strain-rate spatiotemporal images along each cable section (labelled L1 to L6, westward to eastward). Channels represent the optical distance (in ~meters) along the fiber. Precipitation and soil moisture data shown above cable section L4 for comparison.

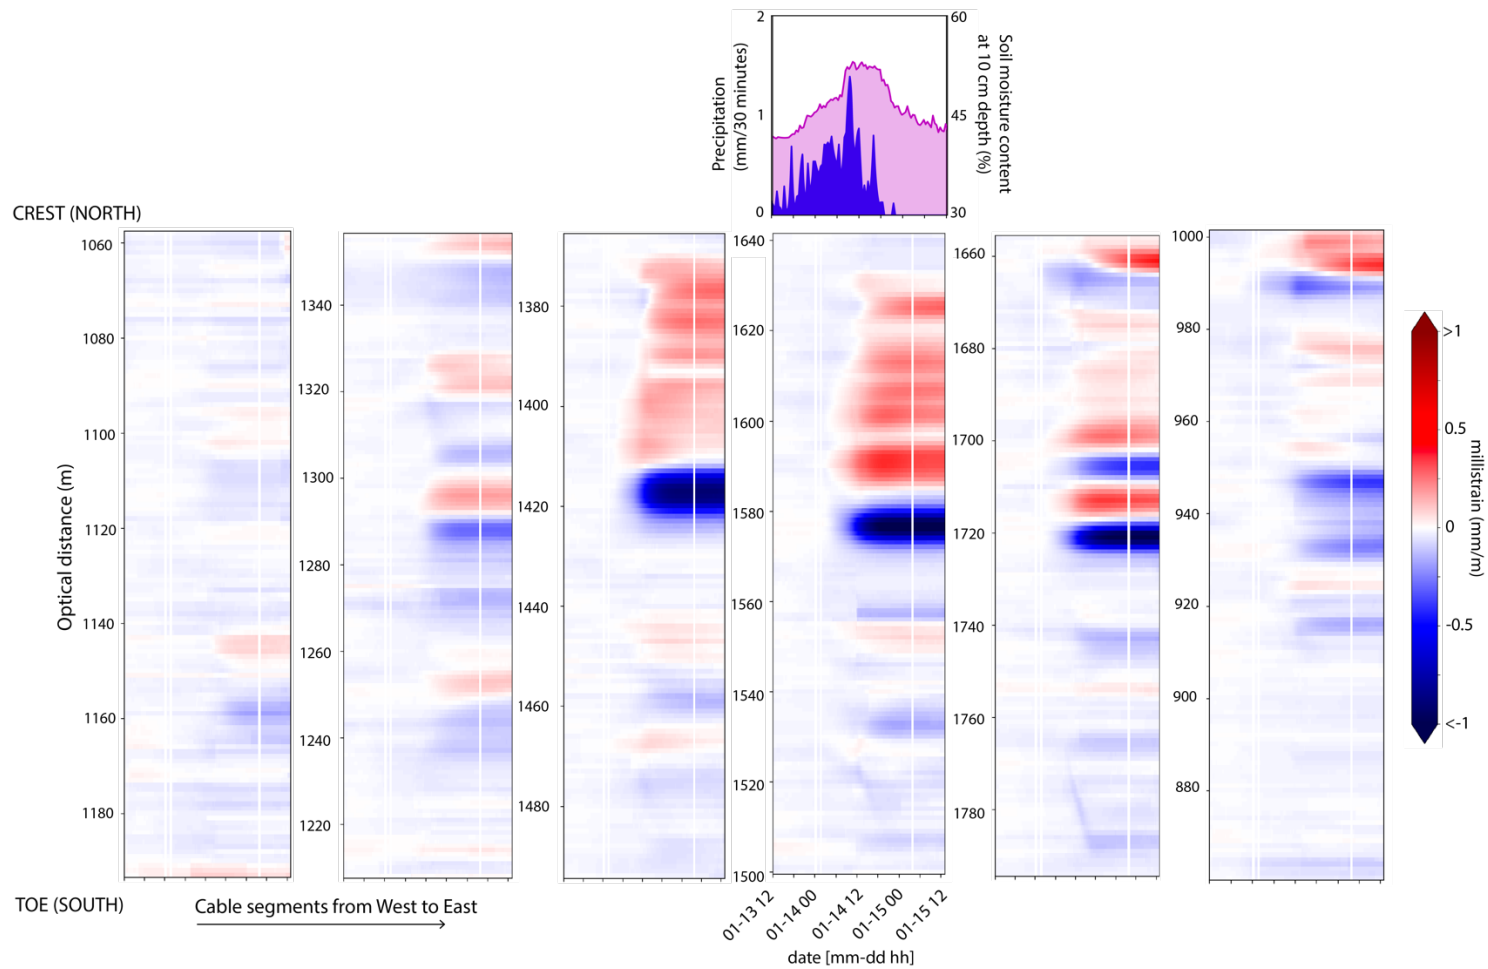

**Fig. S3** DAS strain spatiotemporal images along each cable section (labelled L1 to L6, westward to eastward). Channels represent the optical distance (in ~meters) along the fiber. Precipitation and soil moisture data shown above cable section L4 for comparison.

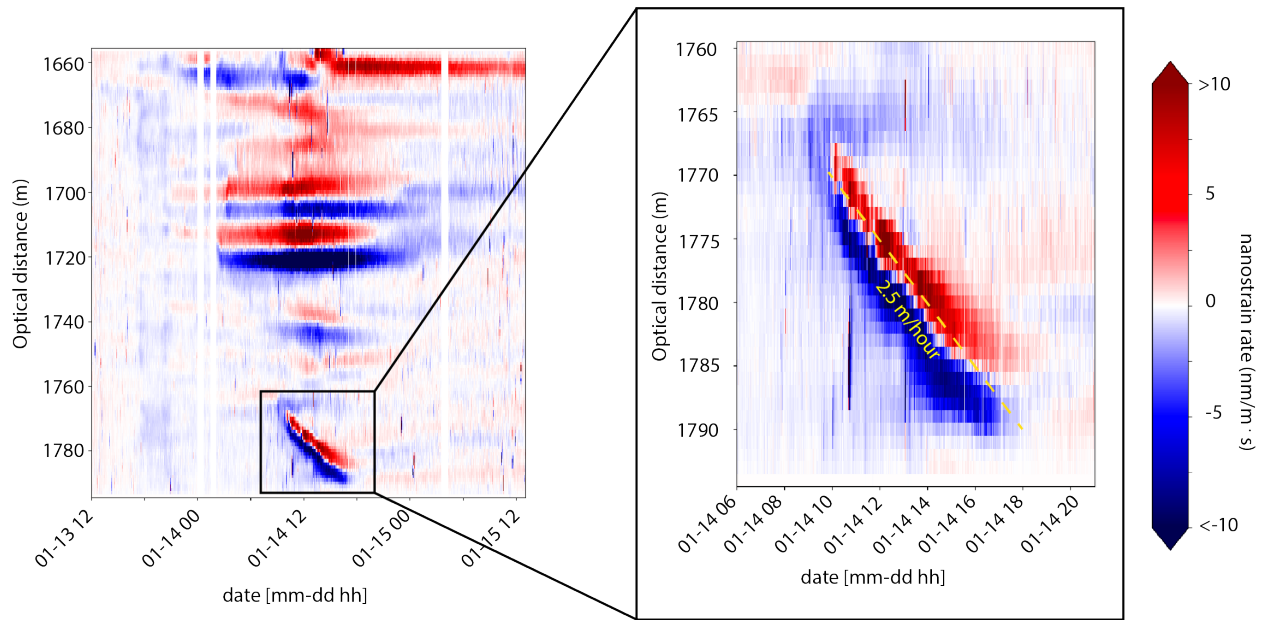

**Fig. S4.** DAS strain rate spatiotemporal image at cable section L5. Inset figure highlights the speed of propagation of the strain rate front, at  $\sim 2.5$  m/ hour.

Strain-rate data at time: 2021-01-14T12:00

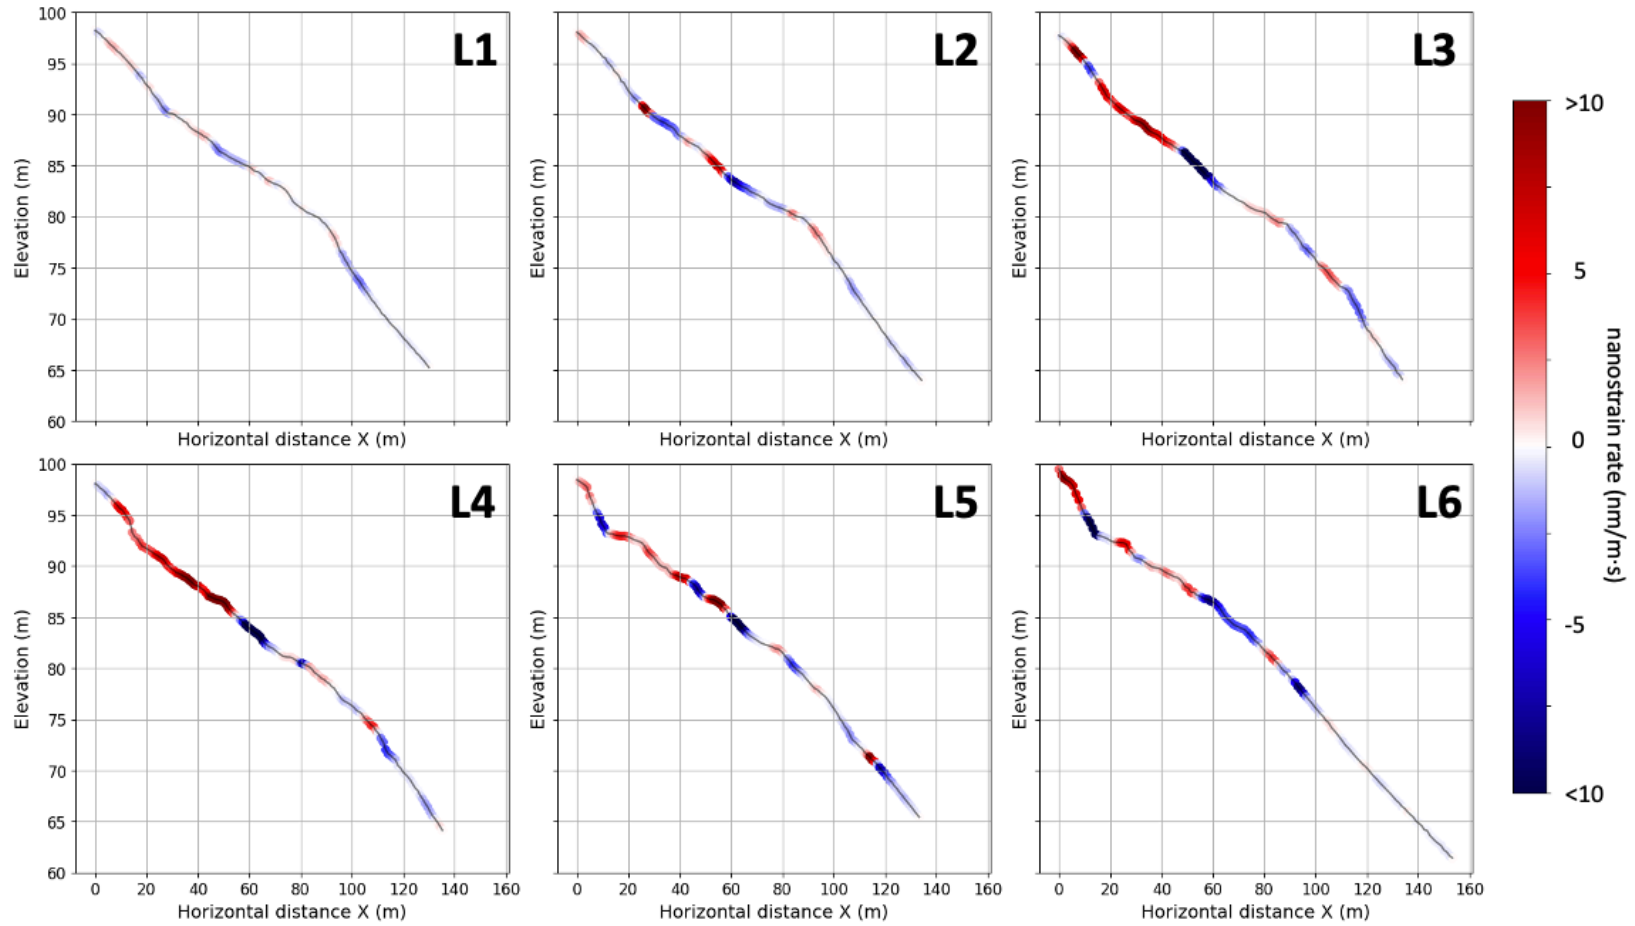

**Fig. S5.** DAS strain-rate data overlain onto topographic sections based on ground lidar survey acquired in November 2020 (labelled L1 to L6, westward to eastward).

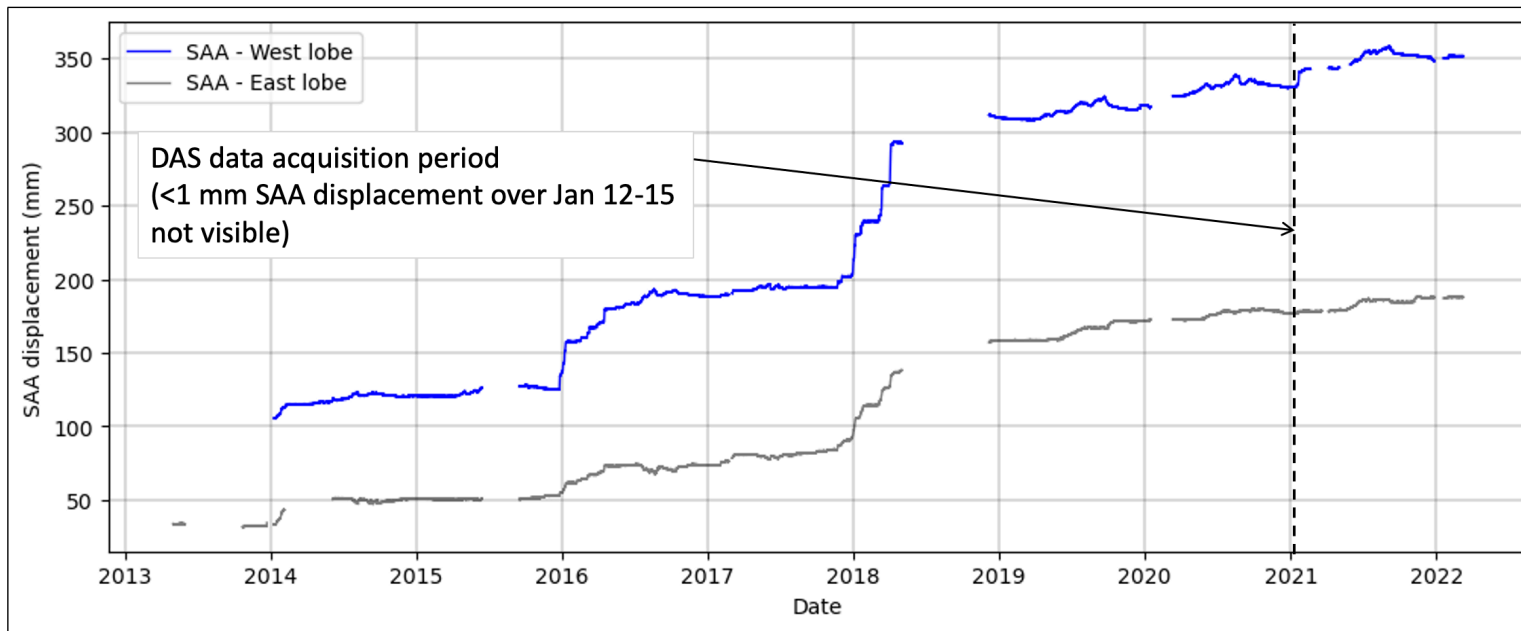

**Fig. S6** West and east lobe ShapeArray displacement from installation in 2013 to 2022. DAS data acquisition period (January 12-15 2021) shown as dashed line to illustrate insignificant displacement (<1 mm) considering overall displacement trends.

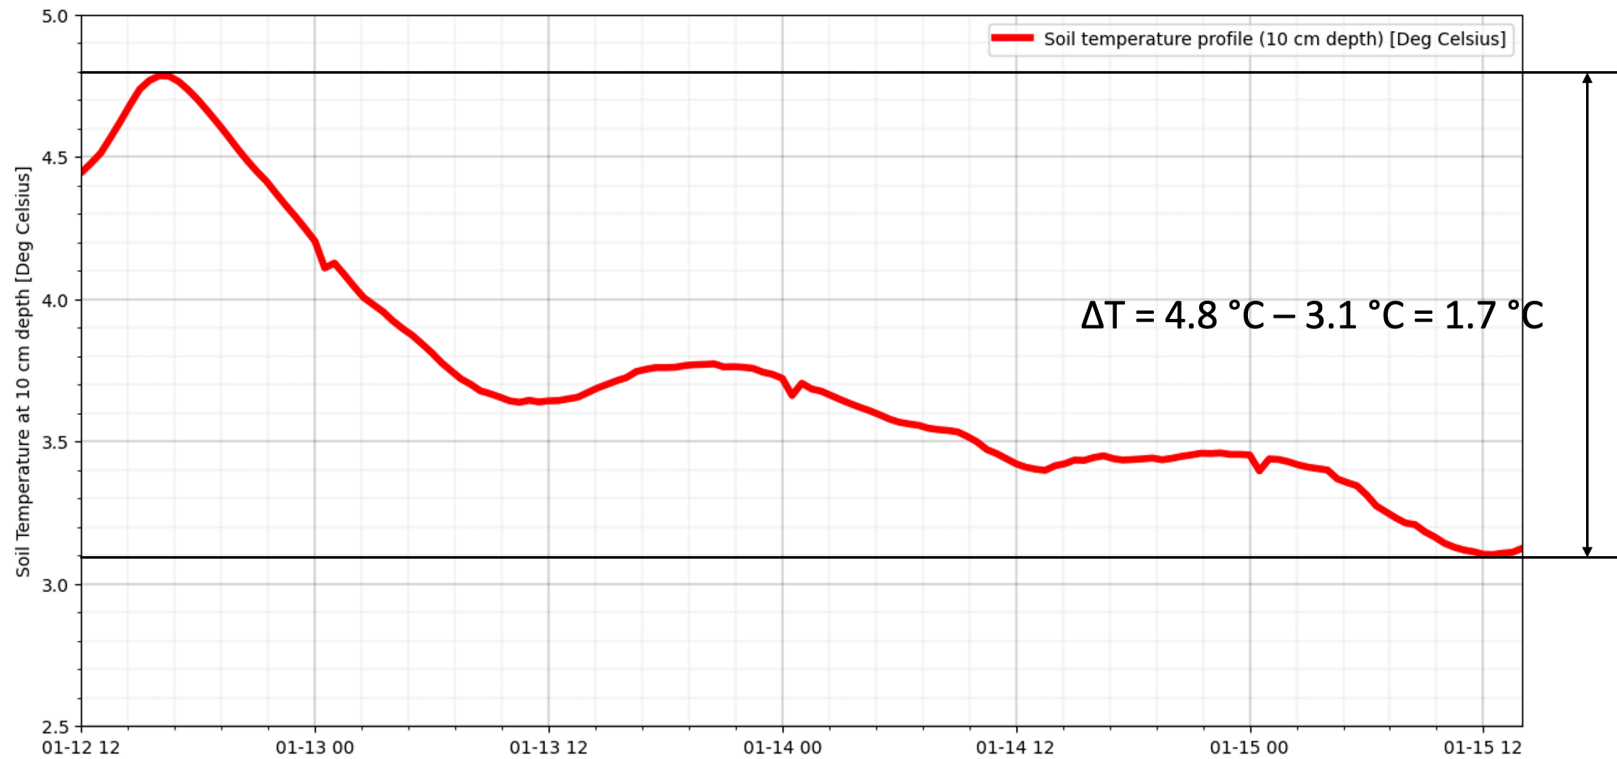

**Fig. S7** Soil temperature sensor installed at 10 cm depth over the three-day DAS acquisition period.



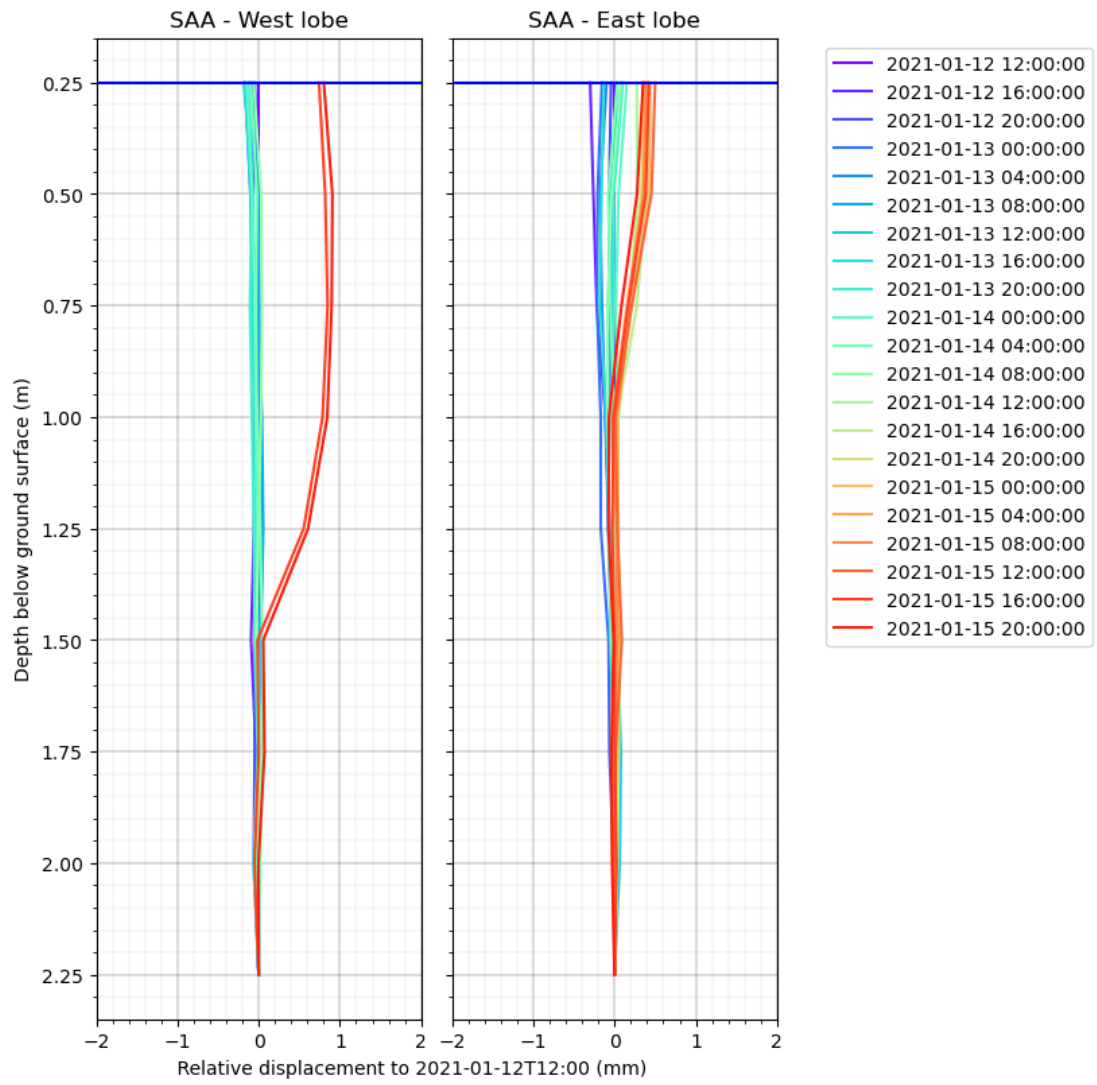

**Fig. S8** SAA displacement profiles for west and east lobe showing change in displacement over DAS data acquisition period.
